# Supplementary material for: Exon-Specific QTLs Skew the Inferred Distribution of Expression QTLs Detected Using Gene Expression Array Data
Source: PubMed Central journal article supplement (PMC3281037; doi:10.1371/journal.pone.0030629), 2012-02-16
Supplement: pone.0030629.s001.pdf [file pone.0030629.s001.pdf]

| Expression Dataset    | References | Samples                            | Probes  | Exons   | Genes | eQTNs       | sQTNs       |
|-----------------------|------------|------------------------------------|---------|---------|-------|-------------|-------------|
| Illumina Gene Array   | [?]        | CEU(60), CHB(45), JPT(45), YRI(60) | 8,613   | 8,613   | 7,848 | 2,896 (37%) | NA          |
| Affymetrix Exon Array | [?]        | CEU(58), YRI(59)                   | 444,306 | 90,245  | 7,470 | 524 (7%)    | 645 (0.75%) |
| RNA-seq               | [?, ?]     | CEU(43), YRI(59)                   | NA      | 103,952 | 9,201 | 214 (2%)    | 142 (0.15%) |

**Table S 1. Summary of the three expression datasets used in this study.** For Illumina and Affymetrix datasets the number of probes corresponds to the final number of probes used after filtering. Both the number of eQTNs and sQTNs are reported for an empirically estimated FDR of 5% (see Material and Methods). For eQTNs, the corresponding p-value cutoffs are: i) Illumina (p-value =  $5 \times 10^{-5}$ ), ii) Affymetrix (p-value =  $8 \times 10^{-6}$ ), iii) RNA-seq (p-value =  $3 \times 10^{-6}$ ). For sQTNs the p-value cutoffs are: i) Affymetrix (p-value =  $1 \times 10^{-5}$ ), ii) RNA-seq (p-value =  $3 \times 10^{-6}$ ). The smaller number of sQTLs in the RNA-seq data may be due to lower power in the RNA-seq data, except for the highest expressed genes (Supplemental Figure 15 of [?]).
